# Supplementary material for: Atomistic modeling of site exchange defects in lithium iron phosphate and iron phosphate
Source: Royal Society of Chemistry journal article supplement (doi:10.1039/c2jm35538h), 2012-01-01
Supplement: c2jm35538h.pdf [file c2jm35538h.pdf]

# Supporting information - Atomistic modeling of site exchange defects in lithium iron phosphate and iron phosphate

Christian Kuss<sup>1</sup>, Guoxian Liang<sup>2</sup>, Steen B. Schougaard<sup>1,\*</sup>

1 Department for Chemistry, Université du Québec à Montréal, 2101 rue Jeanne-Mance, Montreal (QC) H1X 2J6, Canada

2 Phostech Lithium Inc., 1475 rue Marie-Victorin, St.Bruno de Montarville (QC) J3V 6B7, Canada

**Table S1.** Mechanical properties, dielectric constants and heat capacities of LiFePO<sub>4</sub> and FePO<sub>4</sub> from atomistic calculations.

|                       | LiFePO <sub>4</sub> | FePO <sub>4</sub> |
|-----------------------|---------------------|-------------------|
| Bulk moduli           |                     |                   |
| K <sub>Reuss</sub>    | 117.3 GPa           | 63.9 GPa          |
| K <sub>Voigt</sub>    | 118.0 GPa           | 64.4 GPa          |
| K <sub>Hill</sub>     | 117.6 GPa           | 64.1 GPa          |
| Shear moduli          |                     |                   |
| G <sub>Reuss</sub>    | 56.8 GPa            | 36.9 GPa          |
| G <sub>Voigt</sub>    | 59.6 GPa            | 42.5 GPa          |
| G <sub>Hill</sub>     | 58.2 GPa            | 39.7 GPa          |
| Youngs moduli         |                     |                   |
| E <sub>a</sub>        | 142.9 GPa           | 111.0 GPa         |
| E <sub>b</sub>        | 179.6 GPa           | 179.5 GPa         |
| E <sub>c</sub>        | 151.0 GPa           | 97.2 GPa          |
| Dielectric constants  |                     |                   |
| ε <sub>0</sub>        | 19.8                | 17.5              |
| ε <sub>hf</sub>       | 3.77                | 5.19              |
| Heat capacities       |                     |                   |
| C <sub>p</sub> , 100K | 43.5 J/(K.mol)      | 35.1 J/(K.mol)    |
| C <sub>p</sub> , 200K | 87.8 J/(K.mol)      | 70.3 J/(K.mol)    |
| C <sub>p</sub> , 300K | 113.6 J/(K.mol)     | 92.5 J/(K.mol)    |
| C <sub>p</sub> , 400K | 129.7 J/(K.mol)     | 107.1 J/(K.mol)   |
| C <sub>p</sub> , 500K | 140.2 J/(K.mol)     | 116.8 J/(K.mol)   |
| C <sub>p</sub> , 600K | 147.1 J/(K.mol)     | 123.3 J/(K.mol)   |

To assess the transferability of the set of potentials, we calculated the optimized crystal structures of γ-Li<sub>3</sub>PO<sub>4</sub> and the Nasicon analogue Li<sub>3</sub>Fe<sub>2</sub>(PO<sub>4</sub>)<sub>3</sub>:

**Table S2.** Comparison of calculated and experimental crystal structure parameters of γ-Li<sub>3</sub>PO<sub>4</sub>.

| Li <sub>3</sub> PO <sub>4</sub>                                 | Experimental <sup>1</sup> | Calculated | Rel. error / % |
|-----------------------------------------------------------------|---------------------------|------------|----------------|
| a / Å                                                           | 6.12                      | 6.03       | 1.5            |
| b / Å                                                           | 10.53                     | 10.27      | 2.5            |
| c / Å                                                           | 4.93                      | 4.87       | 1.2            |
| Li <sub>3</sub> Fe <sub>2</sub> (PO <sub>4</sub> ) <sub>3</sub> | Experimental <sup>2</sup> | Calculated | Rel. error / % |
| a / Å                                                           | 8.32                      | 8.20       | 1.4            |
| c / Å                                                           | 22.46                     | 21.63      | 3.7            |

It can be seen, that the potentials are valid with restrictions also for other compounds of the lithium and iron phosphate system. Note: This potential set should only be used for structures where oxygen is covalently bonded to phosphor in phosphate groups.

For calculations of defect correlation, we determined a quantity of charge localization on the unit cell scale. This quantity was determined from the relaxed structures by integrating all charges within the volume of one unit cell. This volume was then moved across the complete super cell by  $\frac{1}{4}$  unit cell steps in each crystallographic direction to obtain an average of charge localization in the super cell.

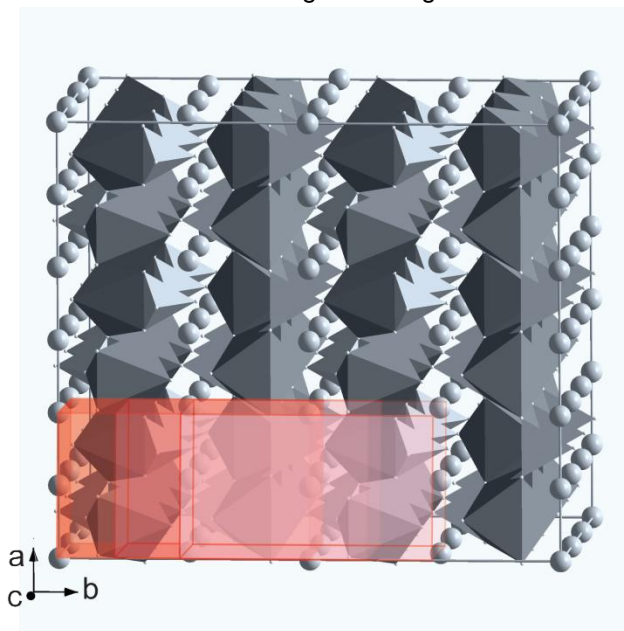

**Figure S1.** Illustration of iterative charge integration to obtain the value termed average localized charge.

The red cuboids correspond to the volume of one unit cell each. The left cuboid determines the integration boundaries for the first integration step. The other cuboids illustrate the movement of the integration boundaries during the iterative integration over the whole super cell. An average of integrated charge per unit cell is then determined for the complete super cell.

## References

1. J. Zemmann, *Acta Crystallographica*, 1960, **13**, 863-867.
2. C. Masquelier, C. Wurm, J. Rodríguez-Carvajal, J. Gaubicher and L. Nazar, *Chem. Mater.*, 2000, **12**, 525-532.
